# Supplementary material for: The Role of Glypicans in Wnt Inhibitory Factor-1 Activity and the Structural Basis of Wif1's Effects on Wnt and Hedgehog Signaling
Source: PubMed Central journal article supplement (PMC3285576; doi:10.1371/journal.pgen.1002503), 2012-02-23
Supplement: pgen.1002503.s001.pdf [file pgen.1002503.s001.pdf]

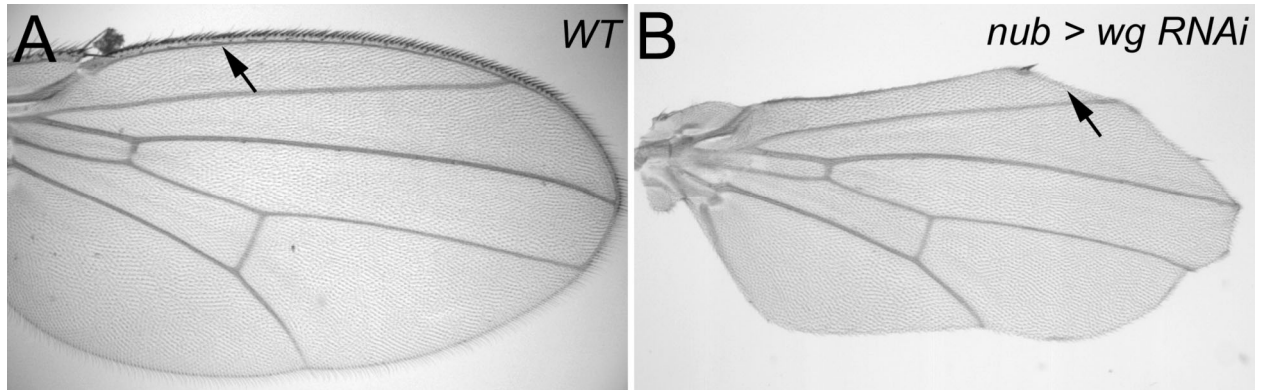

**Figure S1. Reductions in Wg signaling disrupt wing margin development**

Comparison of wild type adult wing (**A**) featuring dense array of anterior sensory bristles along longitudinal vein 1 (L1, arrow), and wing resulting from *nub-Gal4*-driven expression of *UAS-wg RNAi* in the prospective wing blade (**B**). Knockdown of *wg* expression causes loss of wing margin bristles, loss of L1 (arrow) and scalloping of the wing margin. Anterior is up and distal is to the right.
