# Supplementary material for: The Role of Glypicans in Wnt Inhibitory Factor-1 Activity and the Structural Basis of Wif1's Effects on Wnt and Hedgehog Signaling
Source: PubMed Central journal article supplement (PMC3285576; doi:10.1371/journal.pgen.1002503), 2012-02-23
Supplement: pgen.1002503.s004.pdf [file pgen.1002503.s004.pdf]

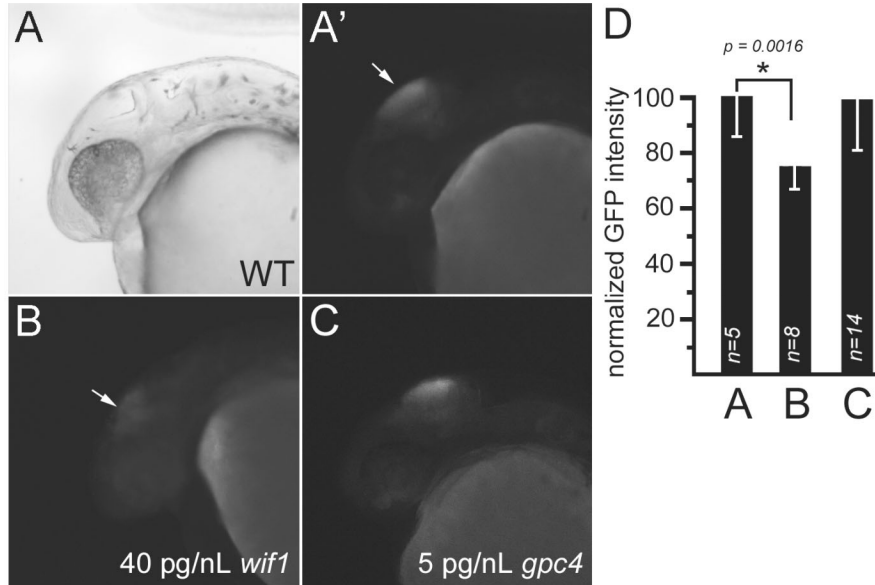

**Figure S4. *Wif1* expression in zebrafish embryos leads to decreased expression of a  $\beta$ -catenin-regulated reporter.**

(A, A') DIC (A) and fluorescence (A') images of embryos carrying the *Tg(TOP:dGFP)* reporter, showing GFP expression in the dorsal midbrain (arrow), anterior to the midbrain-hindbrain boundary. (B) Injection of 40 pg/nL of *wif1* mRNA reduces GFP expression (arrow). (C) Injection of 5 pg/nL of *kny* mRNA does not change GFP expression. (D) GFP intensities were measured in living embryos and their statistically significant differences were verified by two-tailed Mann-Whitney U test. Statistically significant differences in GFP intensity were measured. No differences of statistical significance from were observed between wild-type and *kny*-injected embryos.
