# Supplementary material for: The Role of Glypicans in Wnt Inhibitory Factor-1 Activity and the Structural Basis of Wif1's Effects on Wnt and Hedgehog Signaling
Source: PubMed Central journal article supplement (PMC3285576; doi:10.1371/journal.pgen.1002503), 2012-02-23
Supplement: pgen.1002503.s005.pdf [file pgen.1002503.s005.pdf]

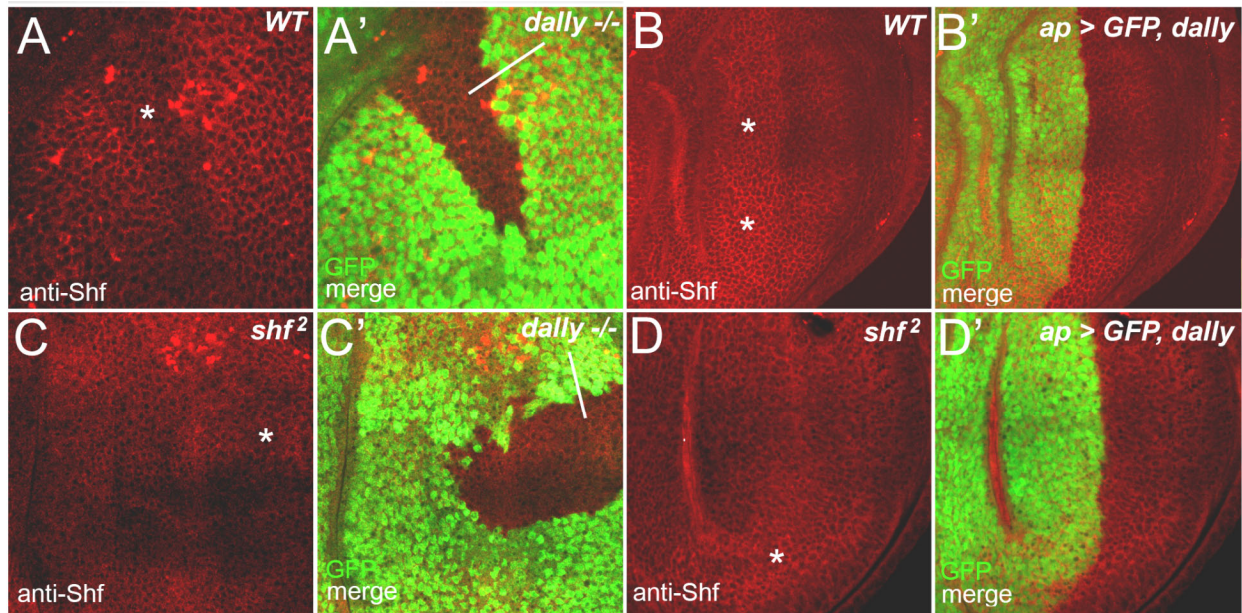

**Figure S5. Shf interactions with the *D. melanogaster* glypican Dally require normal ‘EGF-like’ domains.**

(**A, B**) Changes in anti-Shf staining (red) in wild type discs (WT) containing *dally* mutant clones (A) or overexpressing *dally* (B). Anti-Shf staining is reduced (asterisk) in a *dally* mutant clone (marked by the absence of GFP in green) in the anterior compartment (A). Dorsal, *ap-Gal4*-driven expression of *UAS-dally* (marked using *UAS-GFP*, green) stabilizes Shf (B, asterisk). (**C, D**) In *shf<sup>2</sup>*, discs, anti-Shf staining is not reduced in an anterior *dally* mutant clone (C, asterisk), or increased by dorsal, *ap-gal4* driven *UAS-dally* expression (D, asterisk). *Shf<sup>2</sup>* protein contains a missense mutation in Shf’s third ‘EGF-like’ domain.
