# Supplementary material for: The Role of Glypicans in Wnt Inhibitory Factor-1 Activity and the Structural Basis of Wif1's Effects on Wnt and Hedgehog Signaling
Source: PubMed Central journal article supplement (PMC3285576; doi:10.1371/journal.pgen.1002503), 2012-02-23
Supplement: pgen.1002503.s006.pdf [file pgen.1002503.s006.pdf]

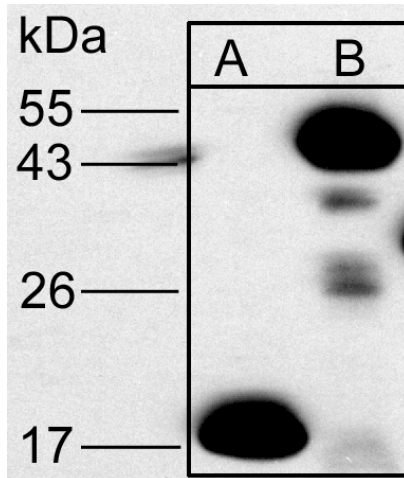

**Figure S6. Full length and EGF-depleted Wif1 are secreted by *Drosophila* S2 cells**

Constructs were tagged with V5 epitope at their C-termini (Materials and Methods). Respective *pVal-UAS-wif1-V5* and *pVal-UAS-wif1ΔEGF-V5* were co-transfected with *pAW-Gal4*.

Supernatants were harvested at day 5 post-transfection. The low molecular weight band represents Wif1ΔEGF (lane A), which is fully stable since it is secreted at levels virtually equal to the levels of the full length Wif1 (lane B).
