# Supplementary material for: The Role of Glypicans in Wnt Inhibitory Factor-1 Activity and the Structural Basis of Wif1's Effects on Wnt and Hedgehog Signaling
Source: PubMed Central journal article supplement (PMC3285576; doi:10.1371/journal.pgen.1002503), 2012-02-23
Supplement: pgen.1002503.s008.pdf [file pgen.1002503.s008.pdf]

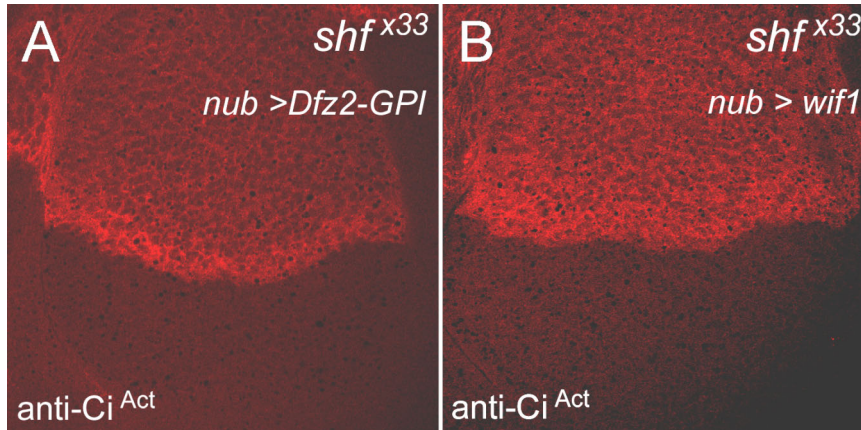

**Figure S8. The effects of Wg signaling on Ci<sup>Act</sup> accumulation in *shf* mutants**

(A) Strong inhibition of Wg signaling in a *shf<sup>x33</sup>/Y* wing disc, using *nub-gal4*- driven *UAS-Dfz2-GPI*, did not alter the width of the domain with strong accumulation of Ci<sup>Act</sup>. Compare to anti-Ci<sup>Act</sup> staining in *shf* mutants in Figure 6D. (B) *nub-gal4*-driven expression of *UAS-wif1* in a *shf<sup>x33</sup>/Y* wing disc caused a broader, less intense domain of Ci<sup>Act</sup>.
