# Supplementary material for: The Role of Glypicans in Wnt Inhibitory Factor-1 Activity and the Structural Basis of Wif1's Effects on Wnt and Hedgehog Signaling
Source: PubMed Central journal article supplement (PMC3285576; doi:10.1371/journal.pgen.1002503), 2012-02-23
Supplement: pgen.1002503.s009.pdf [file pgen.1002503.s009.pdf]

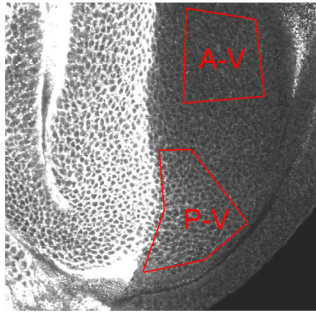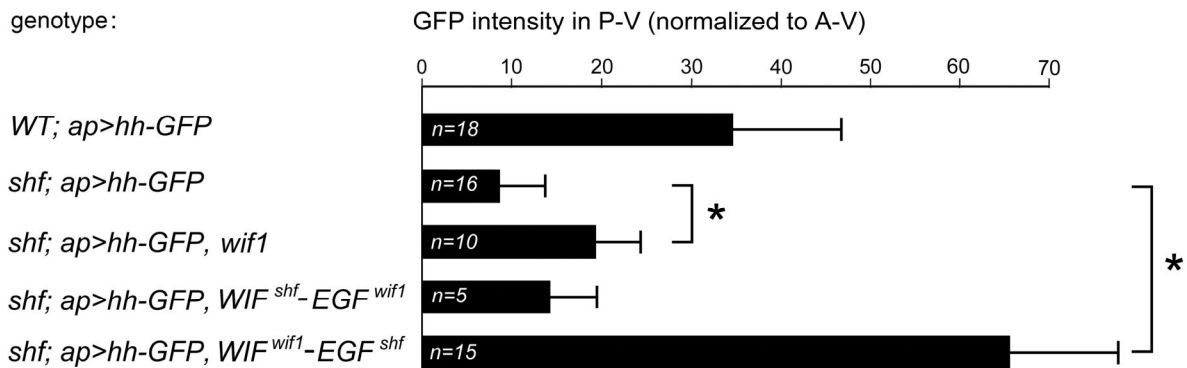

### Figure S9. Effects of Wif1 and chimeric Wif1:Shf proteins on Hh-GFP levels

Constructs were expressed in *shf* nulls (*shf<sup>α33</sup>*). The image in the upper panel shows areas sampled for the measurements, and the chart shows the GFP intensities in arbitrary units. Values obtained for the Posterior-Ventral quadrant (P-V) were normalized, and expressed as the percentage of signal intensity compared to the Anterior Ventral quadrant (A-V) where the Hh-GFP signal is at background levels. Graph shows averaged values and error bars show standard deviation. Differences of statistical significance were determined using the two-tailed Mann-Whitney U Test. In *shf* discs, Hh-GFP diffusion into the ventral compartment was significantly enhanced (asterisks) by Wif1 ( $p=0.023$ ) or WIF<sup>Wif1</sup>-EGF<sup>Shf</sup> ( $p<0.001$ ), but not significantly enhanced by WIF<sup>Shf</sup>-EGF<sup>Wif1</sup> ( $p=0.153$ ).
